# Supplementary material for: Revisiting AB2 + A-R copolymerization: direct access to Janus and peripherally clickable hyperbranched polyesters
Source: Royal Society of Chemistry journal article supplement (doi:10.1039/d4py01412j), 2025-01-01
Supplement: d4py01412j1.pdf [file d4py01412j1.pdf]

## Supporting Information

### **Revisiting $AB_2 + A-R$ copolymerization: Direct access to *Janus* and peripherally *clickable* hyperbranched polymers**

Runa Singla,<sup>1</sup> E. Bhoje Gowd<sup>2</sup> and S. Ramakrishnan<sup>1\*</sup>

<sup>1</sup>Department of Inorganic and Physical Chemistry

Indian Institute of Science, Bangalore 560012 INDIA

<sup>2</sup>Materials Science and Technology Division

CSIR-National Institute for Interdisciplinary Science and Technology (CSIR-NIIST)

Trivandrum 695019 INDIA

\*Email: [raman@iisc.ac.in](mailto:raman@iisc.ac.in)

## Contents

|                                                                  | Page no. |
|------------------------------------------------------------------|----------|
| 1) NMR spectrum of DMHHI monomer                                 | 3        |
| 2) NMR spectra of HBP homopolymer and HBP amphiphilic polymer.   | 4-8      |
| 3) Estimation of Degree of Branching                             | 9-11     |
| 4) NMR spectra of HBPs clicked with MPEG-SH                      | 12-15    |
| 5) NMR of NADSH fluorophore & HBP clicked with NADSH and MPEG-SH | 16-17    |
| 6) SAXS profile of HBP C22: MPEG 350 after annealing             | 18       |
| 7) GPC table of HBPs systems                                     | 19       |

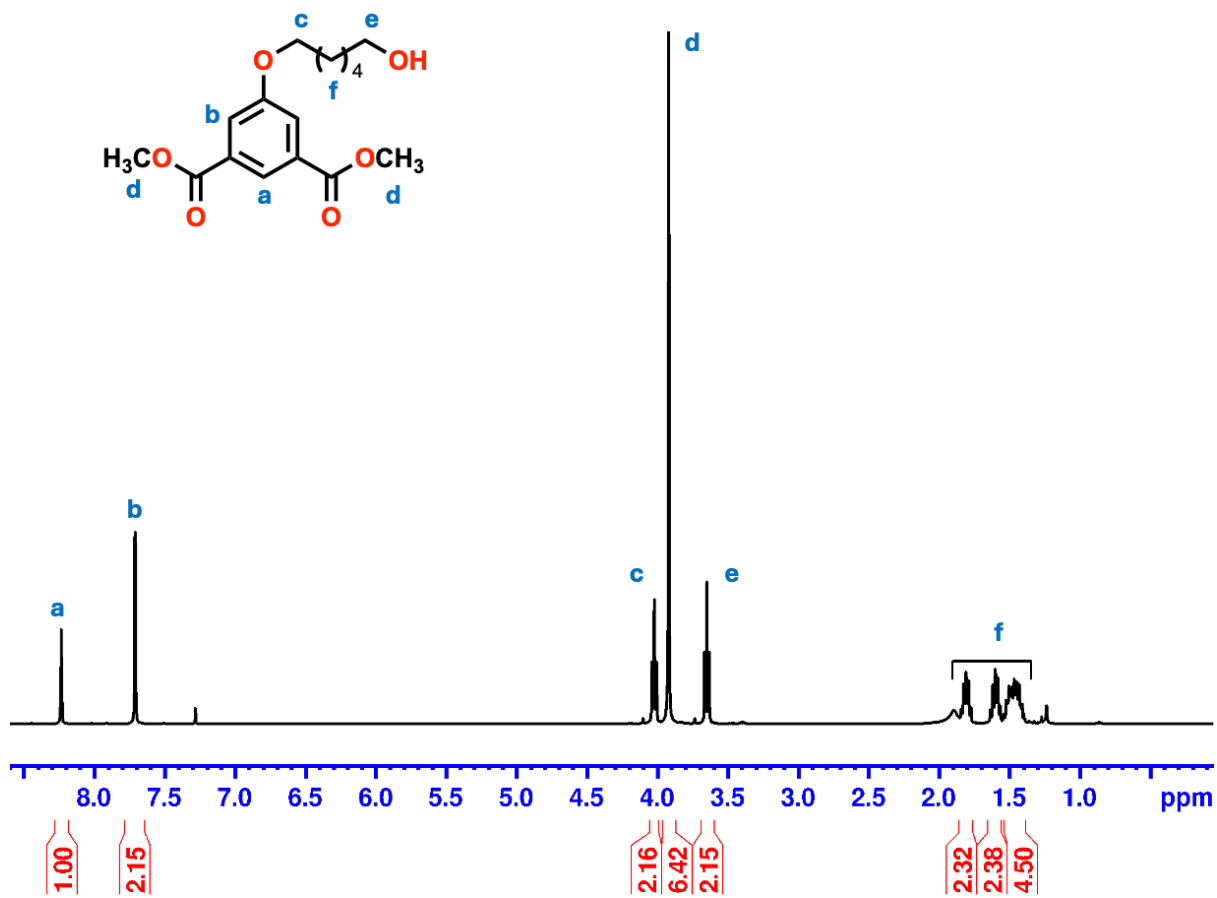

**Figure S1** : <sup>1</sup>H-NMR(CDCl<sub>3</sub>) spectrum of DMHHI monomer

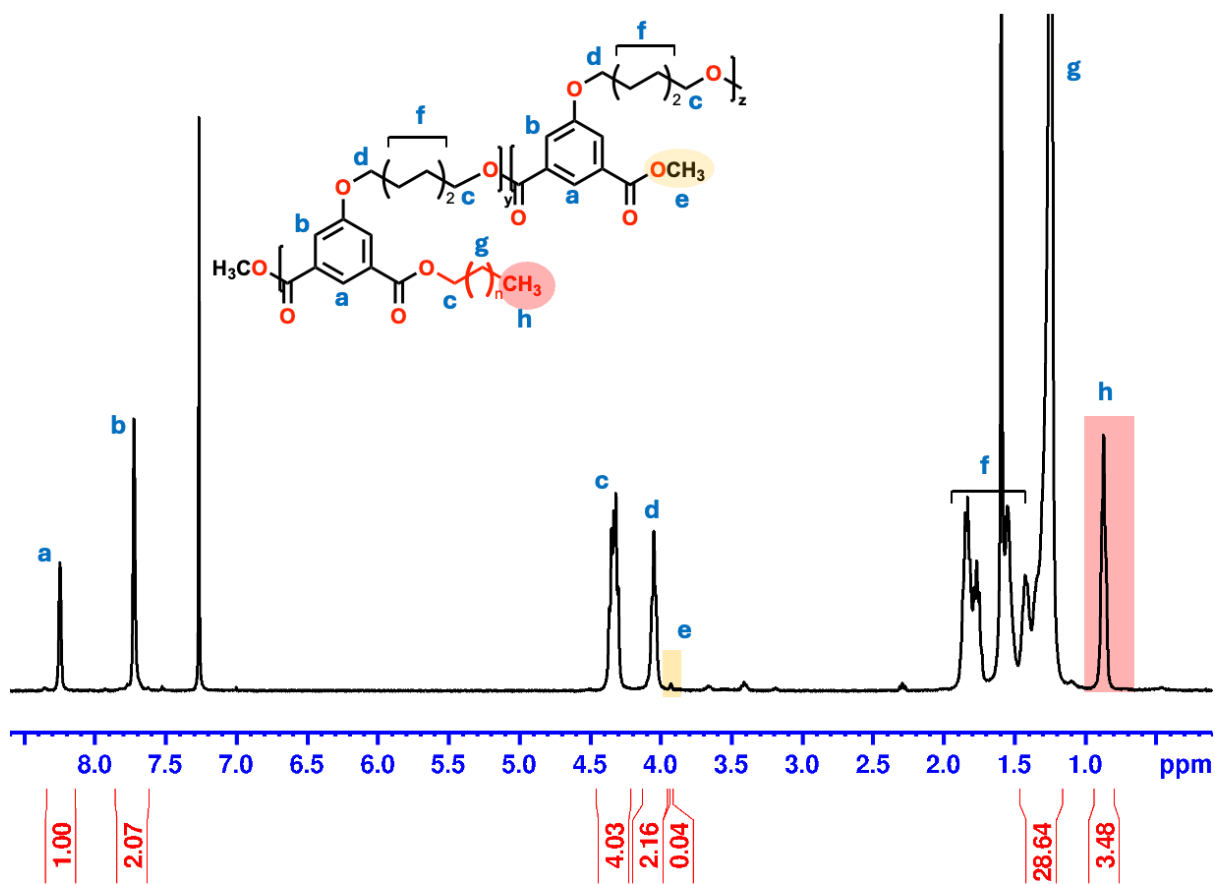

**Figure S2:** <sup>1</sup>H-NMR(CDCl<sub>3</sub>) spectrum of HBP C16 homopolymer

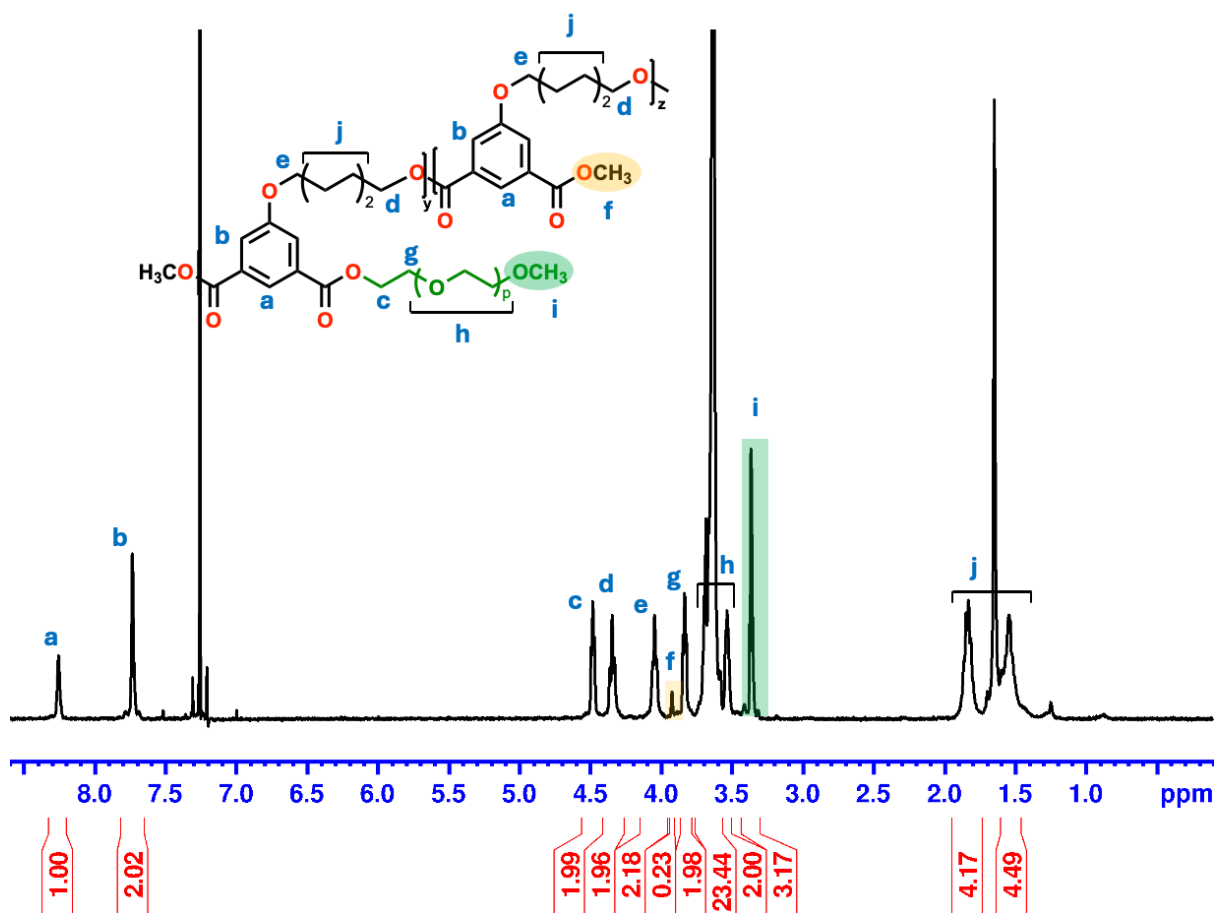

**Figure S3 :** <sup>1</sup>H-NMR(CDCl<sub>3</sub>) spectrum of HBP MPEG350 homopolymer

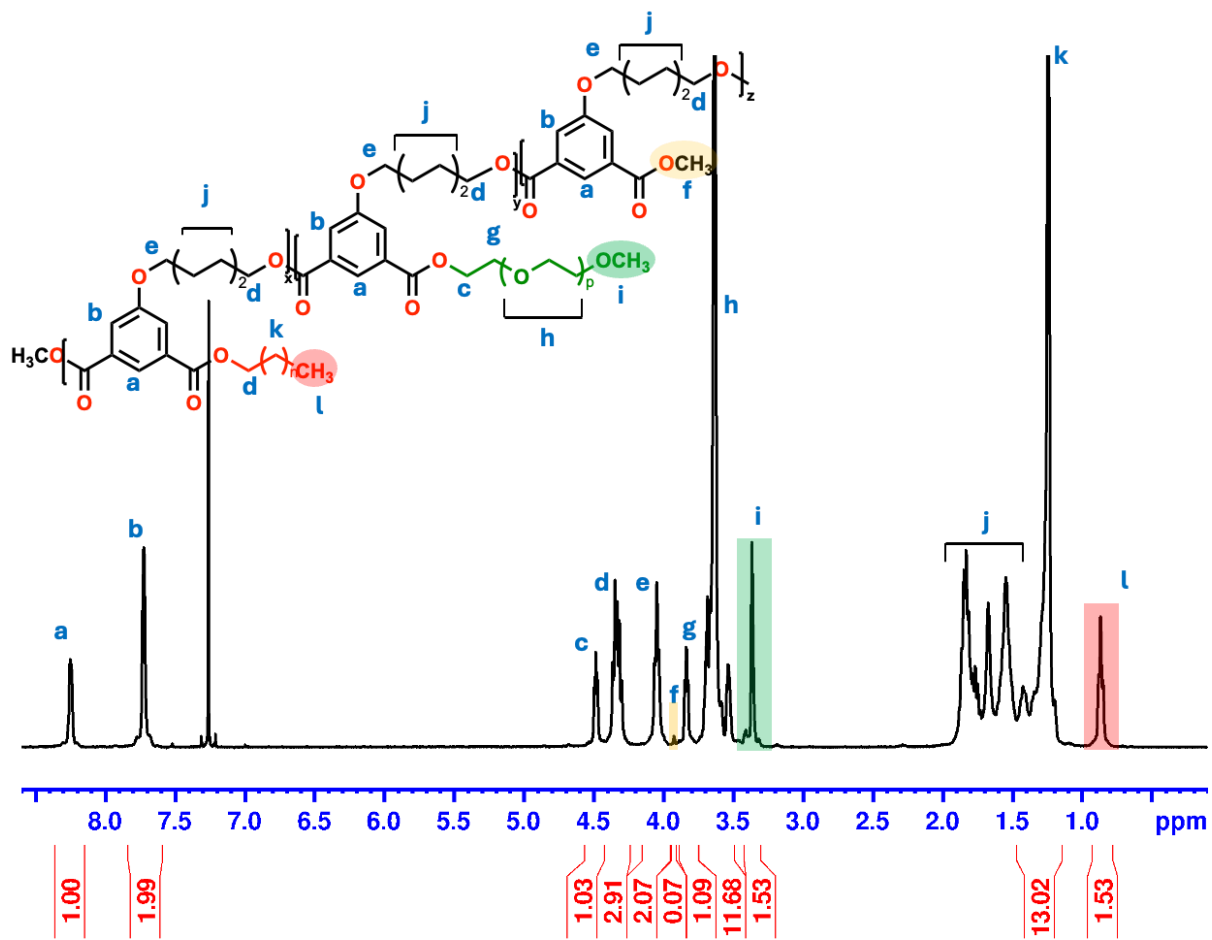

**Figure S4** : <sup>1</sup>H-NMR(CDCl<sub>3</sub>) spectrum of HBP C16: MPEG350

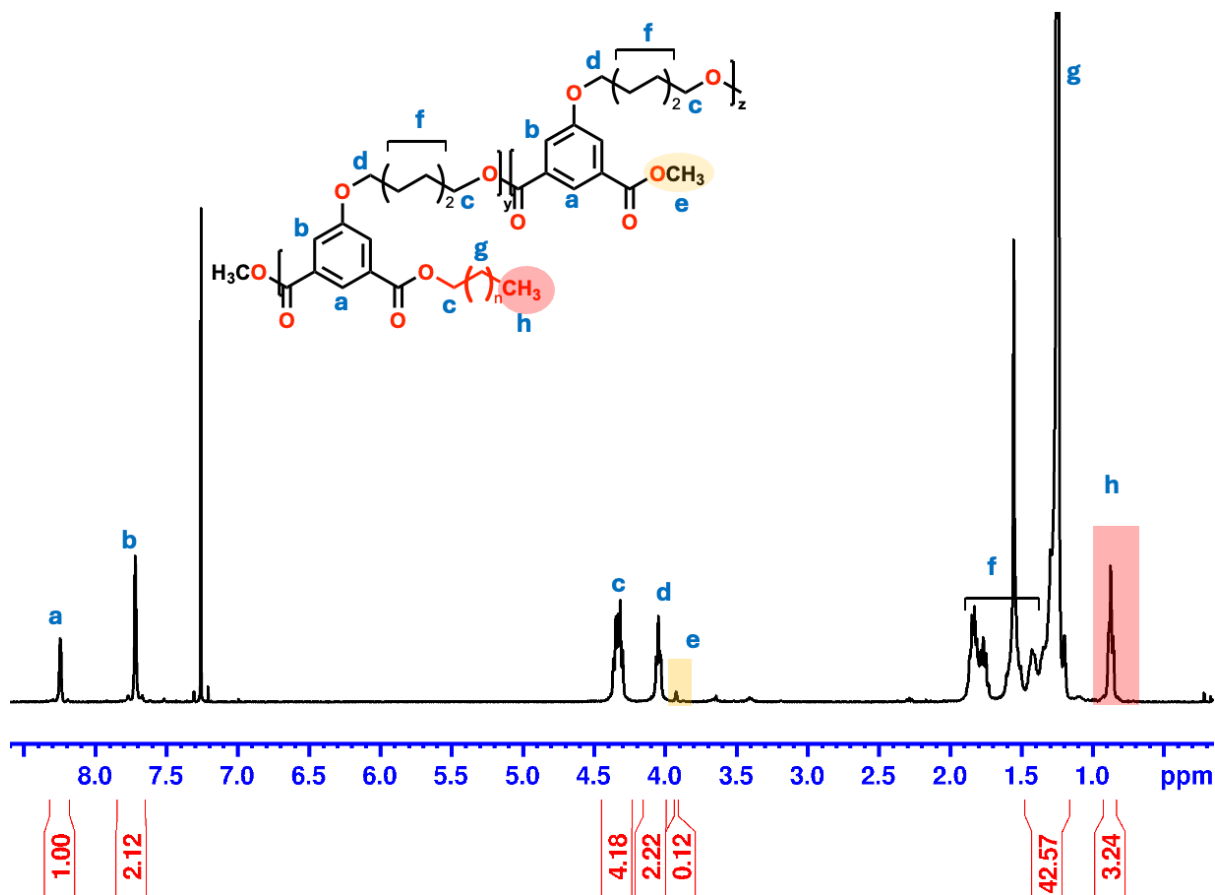

**Figure S5:** <sup>1</sup>H-NMR(CDCl<sub>3</sub>) spectrum of HBP C22 homopolymer

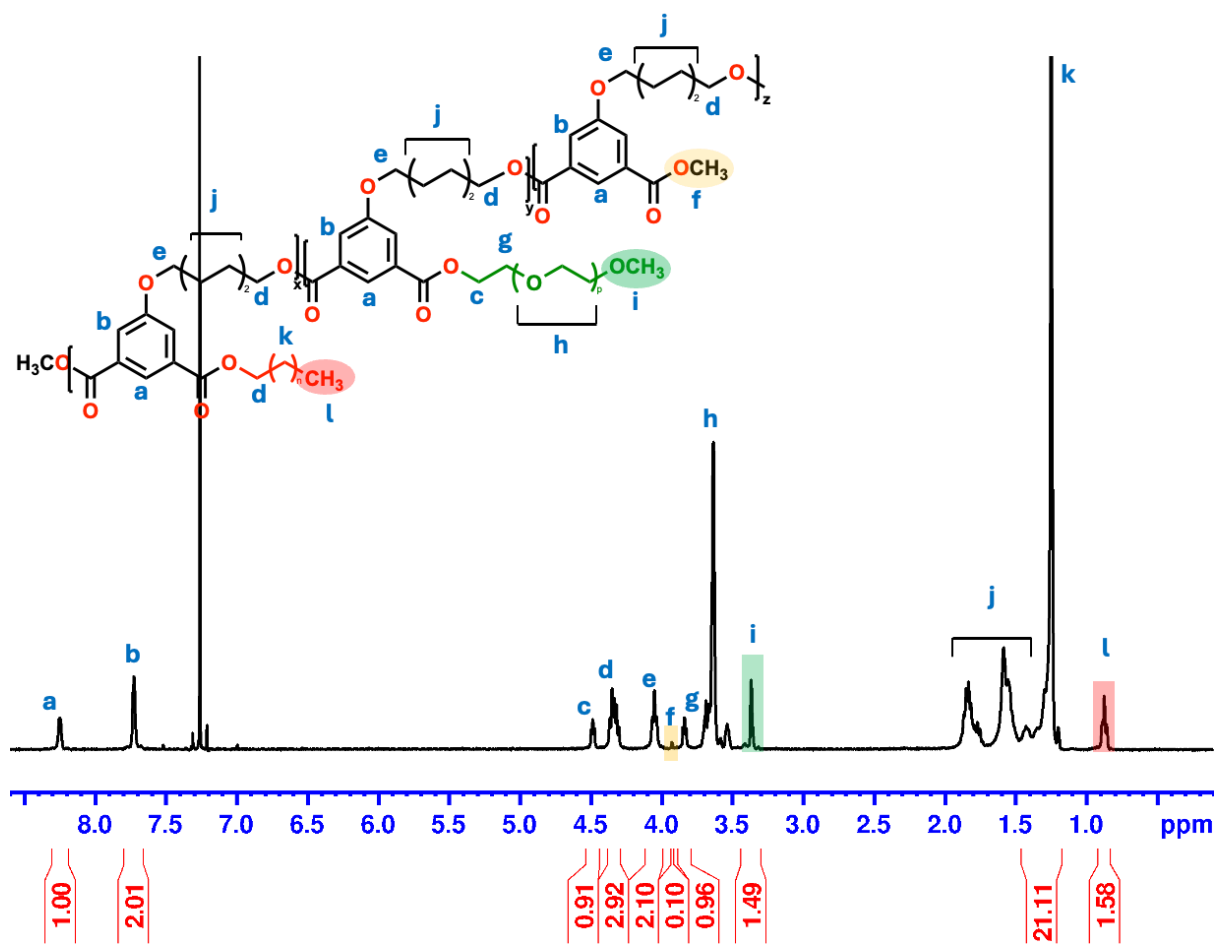

**Figure S6 :** <sup>1</sup>H-NMR(CDCl<sub>3</sub>) spectrum of HBP C22: MPEG350



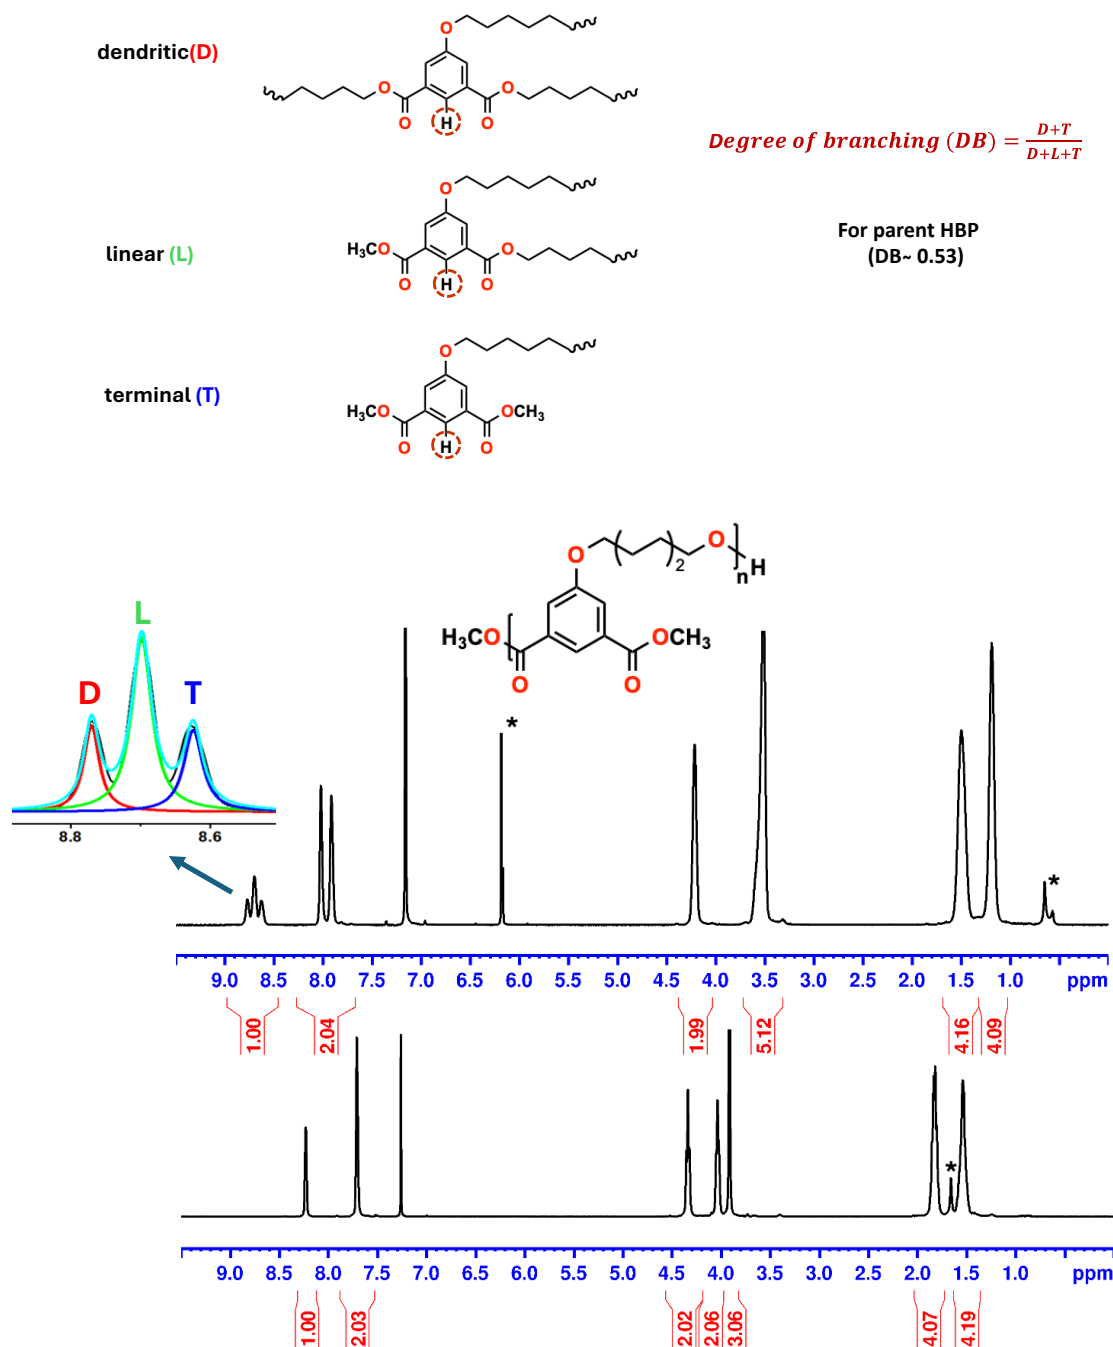

**Figure S7:**  $^1\text{H-NMR}$  bottom ( $\text{CDCl}_3$ ) and top ( $\text{C}_6\text{D}_6$ ) spectrum of parent HBP carrying terminal methyl ester groups (peaks marked by \* are due to solvent/water); as evident the peak due to the most downfield aromatic proton resolves into three in  $\text{C}_6\text{D}_6$  due to Aromatic Solvent Induced Shift (ASIS). The peaks corresponding to the D, T and L were assigned by comparison of this spectra with that of the monomer, where this aromatic proton will appear at chemical shift close to the terminal (T) unit peak; the other two we assigned based on the expectation that the peak will sequentially shift down-field as the methyl ester is displaced with an alkyl/PEG ester. Furthermore, it is known that for high molecular weight HBPs, the D and T units will be present in equal amounts; thus, the peak intensities corresponding to the D and T units is expected to be equal, as seen in this case; this further helps reconfirm the peak assignment. The peak was deconvoluted employing 3 Lorentzian peaks, using Origin software, and their relative areas were estimated and used to calculate the DB.

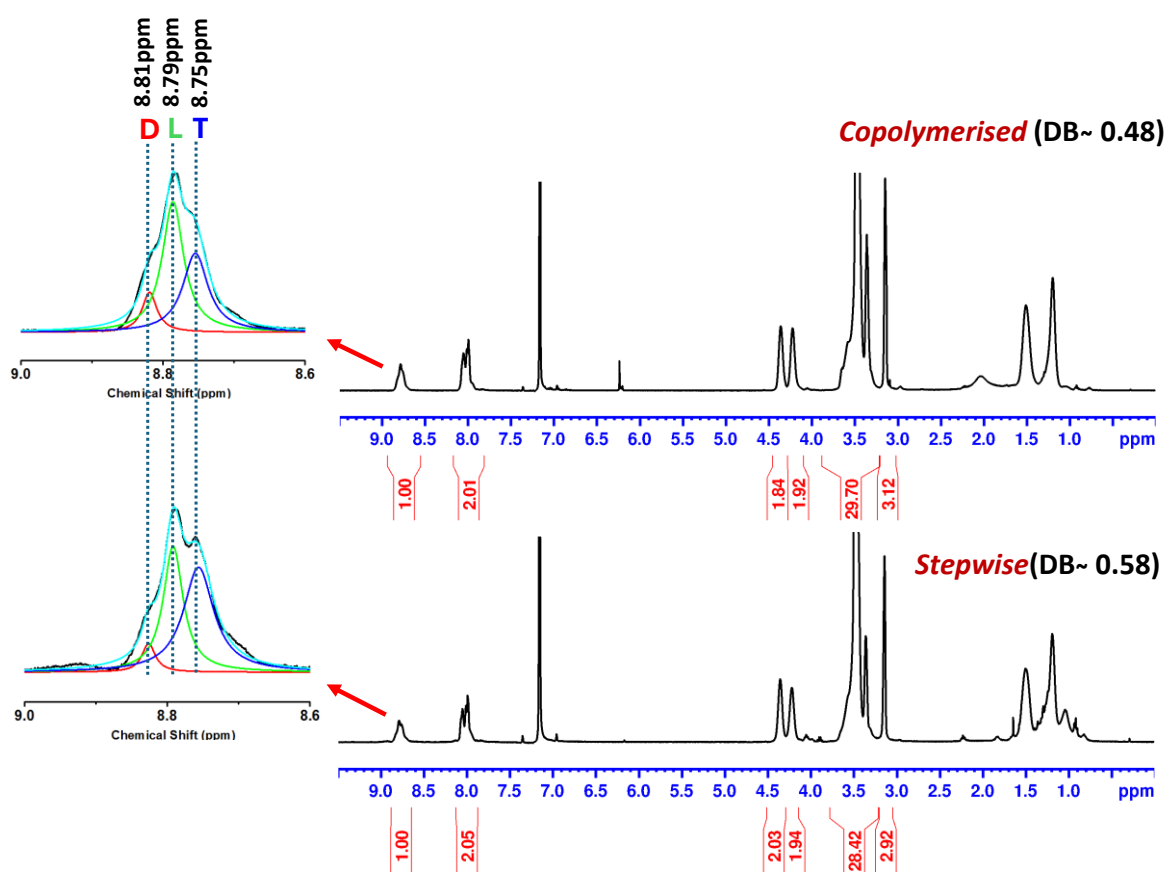

**Figure S8:**  $^1\text{H-NMR}$  (in  $\text{C}_6\text{D}_6$ ) spectrum of HBP-MPEG350, prepared directly using  $\text{AB}_2 + \text{A-R}$  copolymerization (top) and using a two-step process by reacting the parent HB polyester with MPEG350-OH (bottom), under melt transesterification conditions, using DBTDL catalyst  $150^\circ\text{C}$ . Unlike in the parent HB polyester, here the aromatic peak was not well resolved. The reason evidently is that change from methyl ester to any other longer chain ester brought about a significant change in the chemical shift of the aromatic proton; however, the difference between having two different long-chain alkyl esters, like between the D unit and the PEG/alkyl ester or two PEGs, as in the L and T units, respectively, is not very significant. Furthermore, the peak assignment here was based on the assignment in the parent HB polyester and not by direct comparison with a model. Hence, the estimation of DB from these spectra are not very robust; this is also evident from the fact that the peaks assigned to D and T were not of equal intensity, clearly revealing a deficiency in this approach. Hence, the values of DB obtained using this deconvolution may only provide a very rough estimate and not an accurate one.

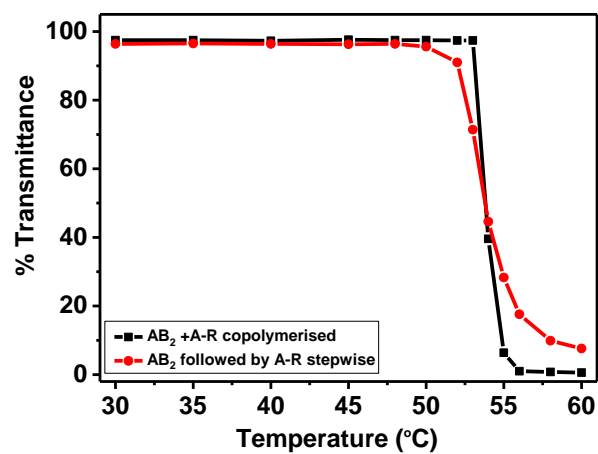

**Figure S9:** LCST plots ( $\lambda=600\text{nm}$ ) of HBP MPEG350 copolymerised in one pot (black) and stepwise (red) wherein AB<sub>2</sub> monomer was polymerised first, followed by addition of MPEG-OH (350)

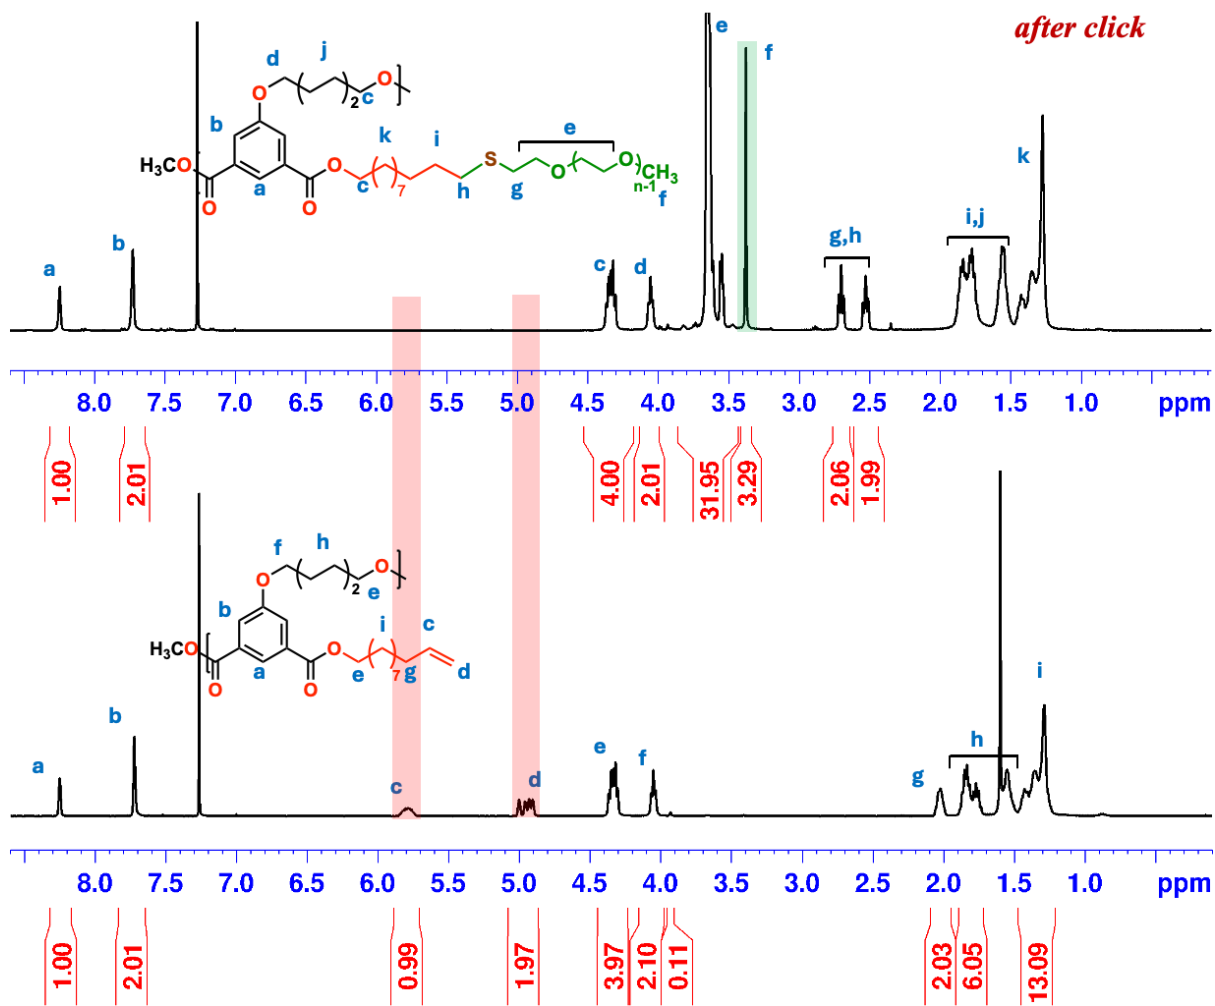

**Figure S10:** <sup>1</sup>H-NMR(CDCl<sub>3</sub>) spectrum of HBP C11 (undecene) and after click HBP C11 (MPEG 350)

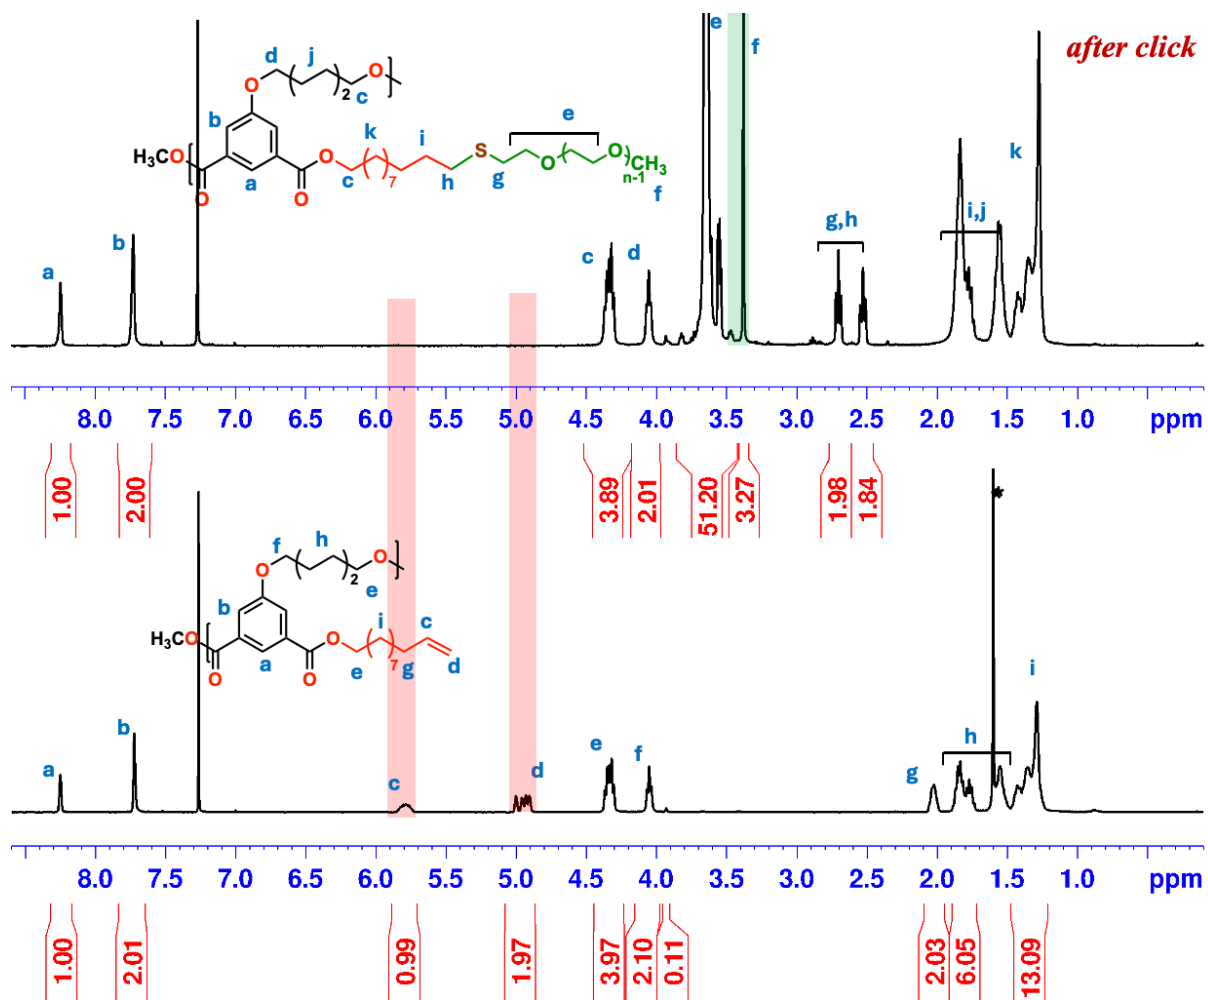

**Figure S11:** <sup>1</sup>H-NMR(CDCl<sub>3</sub>) spectrum of HBP C11 (undecene) and after click HBP C11 (MPEG 550)

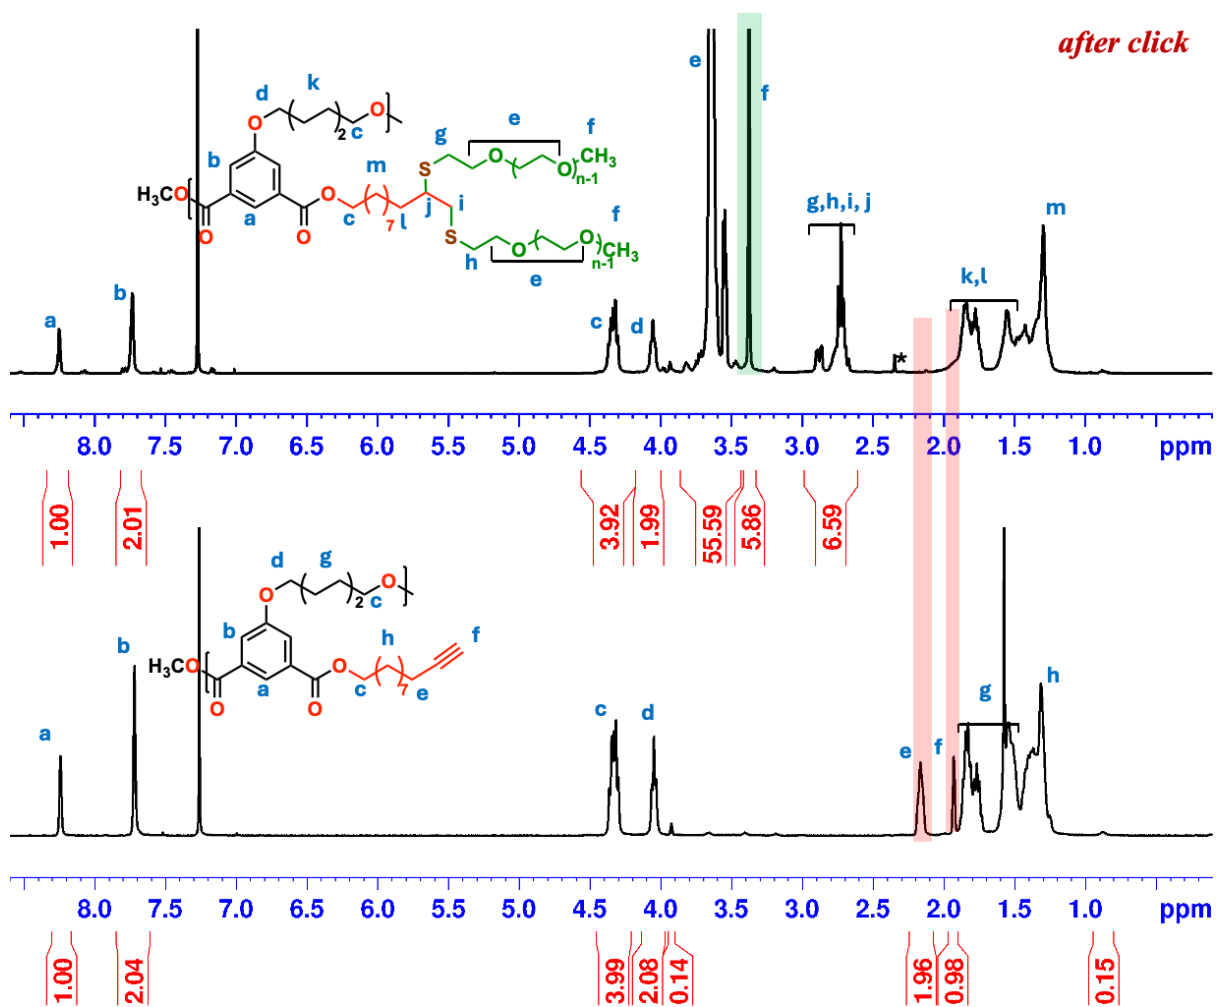

**Figure S12:** <sup>1</sup>H-NMR(CDCl<sub>3</sub>) spectrum of HBP C11 (undecyne) and after click HBP C11 (MPEG 350)<sub>2</sub>

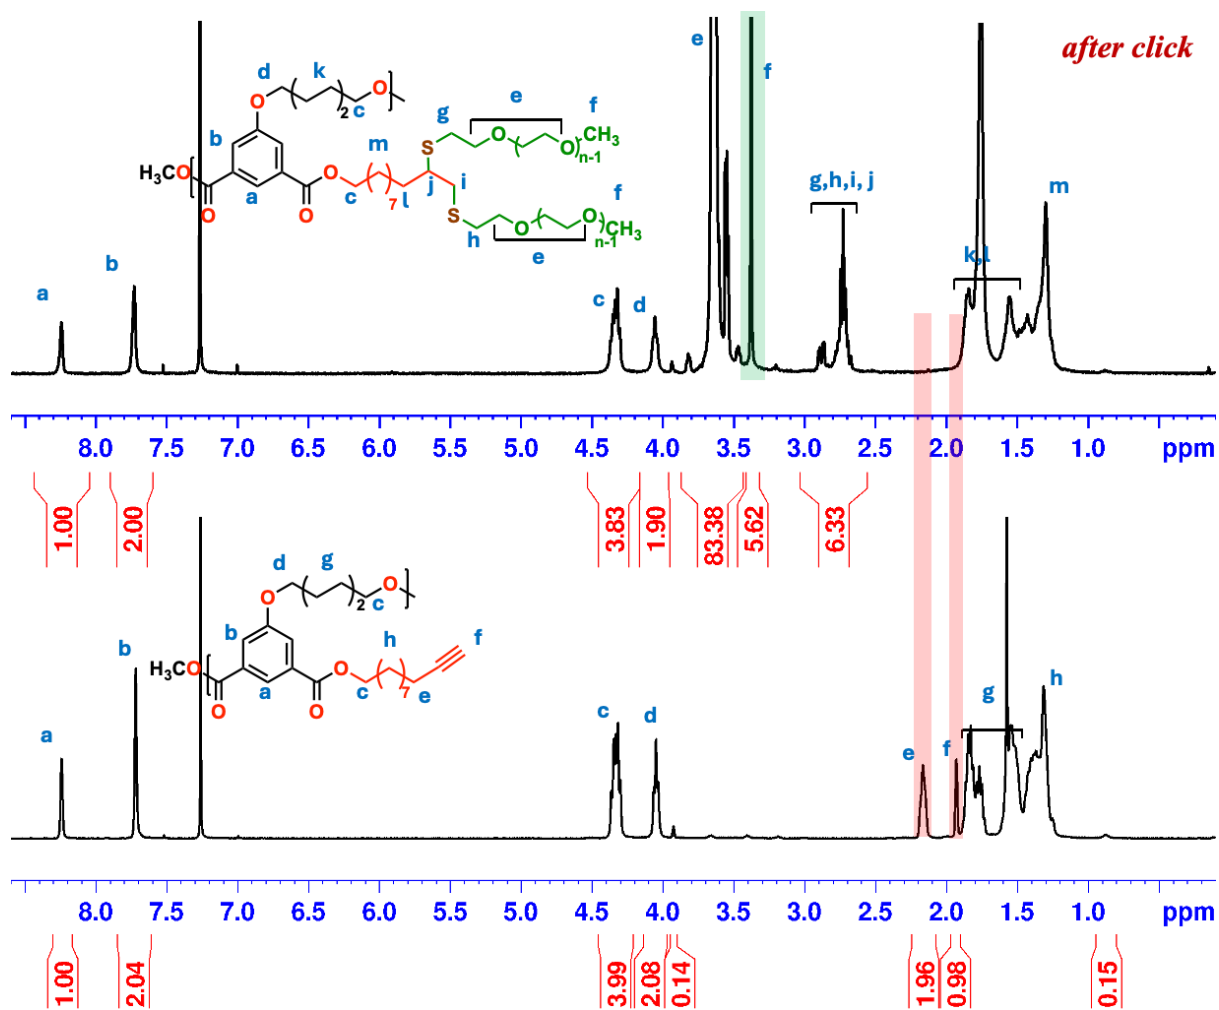

**Figure S13:** <sup>1</sup>H-NMR(CDC<sub>3</sub>) spectrum of HBP C11 (undecyne) and after click HBP C11 (MPEG 550)<sub>2</sub>

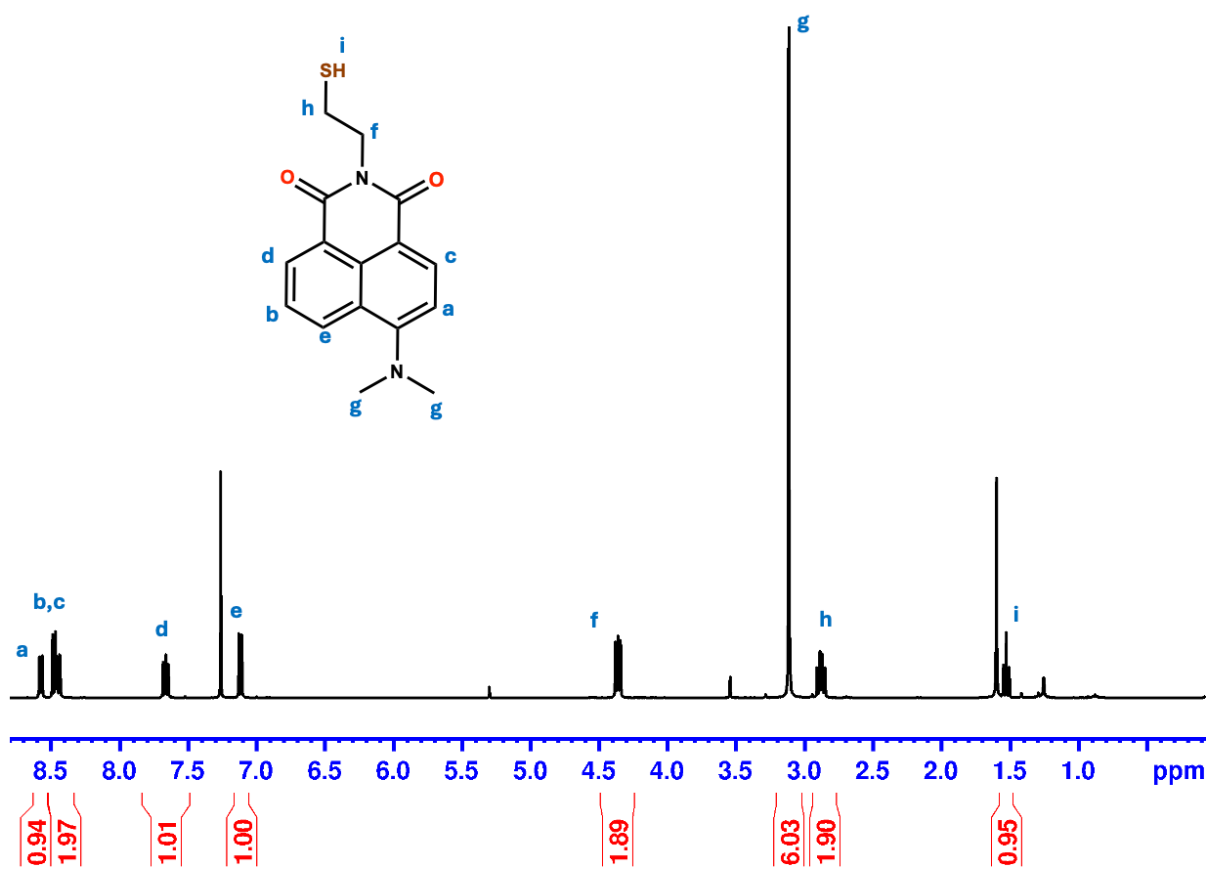

**Figure S14:** <sup>1</sup>H-NMR(CDCl<sub>3</sub>) spectrum of NADSH fluorophore

**Synthesis of HBP C11-yne clicked with MPEG 350 (~95%) and NADSH fluorophore (~5%):**

In step1, HBP C11-yne polymer is taken with 0.1eq. NADSH and 0.1 eq. MPEG350 thiol in presence of 0.05 eq. of DMPA. After 8 hours of irradiation at 365nm, added another 5 eq. of MPEG 350 thiol and 0.18 eq. of DMPA to same solution which was degassed again and carried out click reaction for another 8 hours. After 8 hours, added BHT (a radical scavenger) to quench the radical reaction and clicked polymer was purified by repeated cycles of dissolution and precipitation in CHCl<sub>3</sub> and Pet Ether to get rid of unreacted thiols/ catalyst and BHT. The polymer was dried under reduced pressure and characterised by <sup>1</sup>H-NMR as shown below



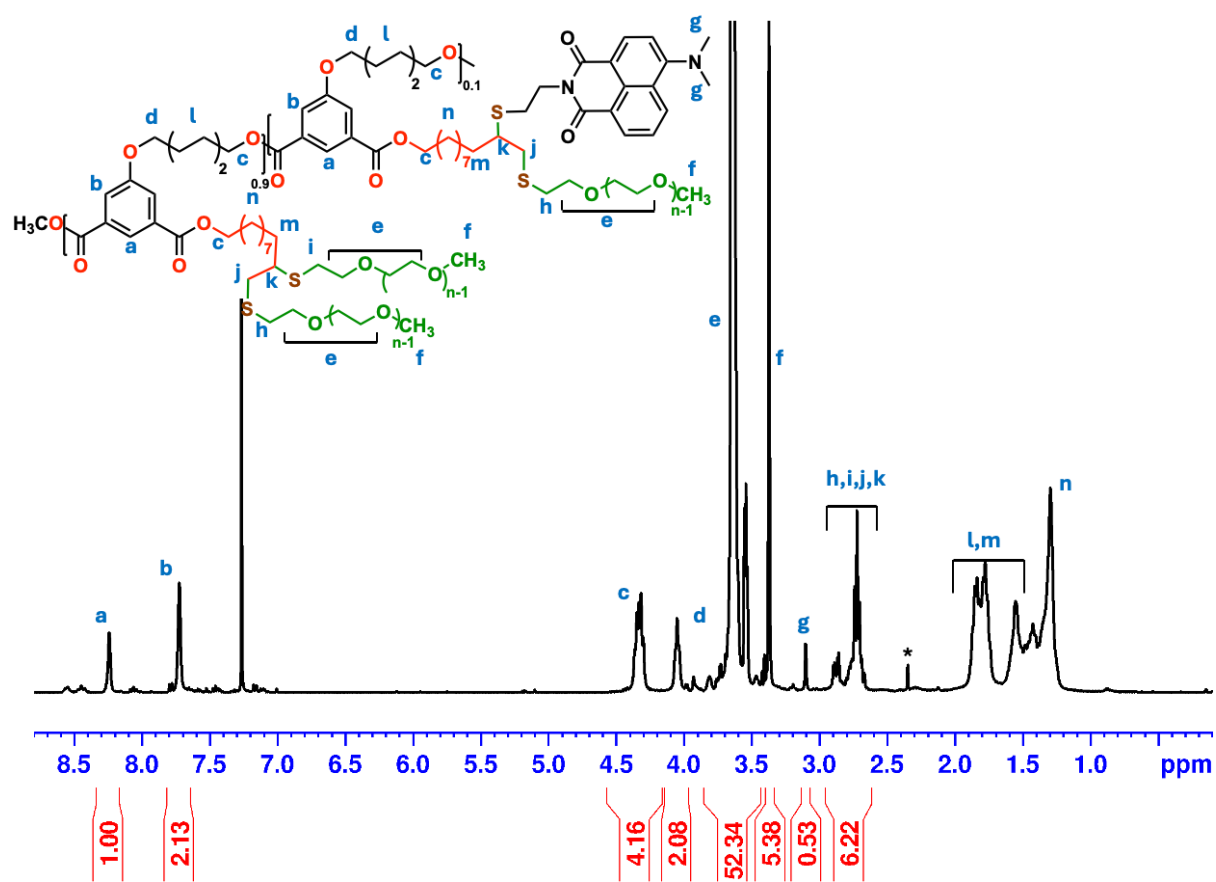

**Figure S15:** <sup>1</sup>H-NMR(CDC<sub>13</sub>) spectrum of HBP C11-yne clicked with MPEG 350 (~95%) and NADSH fluorophore (~5%)

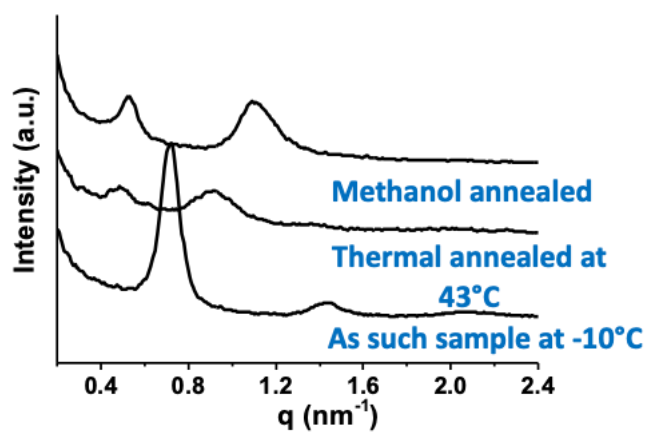

**Figure S16:** SAXS profile for HBP C22:MPEG350 after thermal annealing and MeOH vapour annealing.

**Table S1:** GPC table of HBPs systems

| HBP system                                          | $M_n$  | $M_w$  | M-H constant<br>$\log K$ (dL/g) | M-H<br>exponent $a$ |
|-----------------------------------------------------|--------|--------|---------------------------------|---------------------|
| HBP C16 homopolymer                                 | 12800  | 47300  | -2.5                            | 0.351               |
| HBP C22 homopolymer                                 | 12900  | 61500  | -2.3                            | 0.307               |
| HBP MPEG 350<br>homopolymer                         | 76900  | 89500  | -4.5                            | 0.719               |
| C16:MPEG 350 (1:1)                                  | 27500  | 276000 | -3.6                            | 0.540               |
| C22:MPEG 350 (1:1)                                  | 32200  | 115600 | -3.0                            | 0.441               |
| HBP C11 (Undecene)<br>homopolymer                   | 12800  | 51600  | -2.5                            | 0.384               |
| HBP C11 (MPEG 350)                                  | 69900  | 101200 | -3.1                            | 0.476               |
| HBP C11 (MPEG 550)                                  | 83200  | 93700  | -2.9                            | 0.402               |
| HBP C11 (Undecyne)<br>homopolymer                   | 36500  | 80600  | -3.4                            | 0.525               |
| HBP C11 (MPEG 350) <sub>2</sub>                     | 99400  | 110000 | -4.9                            | 0.770               |
| HBP C11 (MPEG 550) <sub>2</sub>                     | 125000 | 151400 | -5.6                            | 0.830               |
| HBP C11 (0.95 MPEG 350+<br>0.05 NADSH) <sub>2</sub> | 88300  | 92500  | -5.3                            | 0.839               |

The GPC data reveal that the HBPs are of moderate molecular weights; the homo-terminated HBPs carrying long chain alkyl segments (C16 and C22) on their periphery exhibit very compact conformation, as revealed by the low M-H exponent,  $a$  (entries 1 and 2), whereas those carrying MPEG segments exhibit higher values. Likewise, the core-shell amphiphilic HBPs with MPEG segments on their periphery (last three entries) also exhibit high  $a$  value, whereas the Janus-type amphiphilic HBPs exhibit that lie in between, in the range 0.4-0.6.
